# Supplementary figures and images for: Dietary Management of Chronic Kidney Disease and Secondary Hyperoxaluria in Patients with Short Bowel Syndrome and Type 3 Intestinal Failure
Source: MDPI journal article supplement (doi:10.3390/nu14081646), 2022-04-14

Figure S1 – PRISMA Diagram

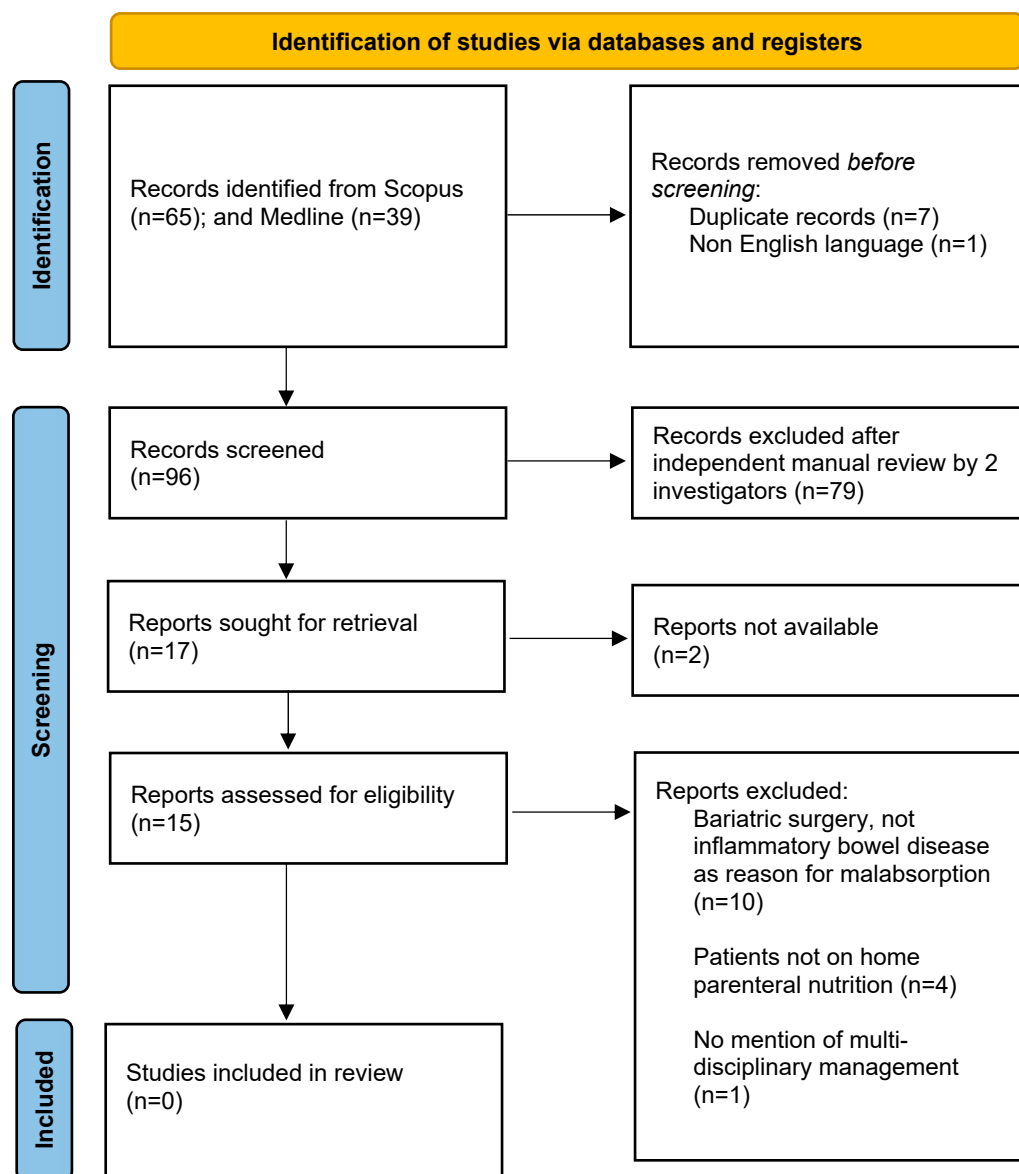

Supplement: s1 [file s1]
